# Supplementary material for: Identification of enhanced hydrogen and ethanol Escherichia coli producer strains in a glycerol-based medium by screening in single-knock out mutant collections
Source: PubMed Central journal article supplement (PMC4485358; doi:10.1186/s12934-015-0285-6), 2015-06-28
Supplement: 12934_2015_285_MOESM2_ESM.pdf [file 12934_2015_285_MOESM2_ESM.pdf]

| Gene knockouts mutants | Accession no. (GeneBank) | Defective gene products                                                                |
|------------------------|--------------------------|----------------------------------------------------------------------------------------|
| <i>aceA</i>            | b4015                    | Isocitrate lyase monomer                                                               |
| <i>aceB</i>            | b4014                    | Malate synthase A                                                                      |
| <i>aceF</i>            | b0115                    | Pyruvate dehydrogenase, dihydrolipoyltransacetylase component E2                       |
| <i>ackA</i>            | b2296                    | Acetate kinase                                                                         |
| <i>acnA</i>            | b1276                    | Aconitate hydratase 1 (Aconitase 1)                                                    |
| <i>acnB</i>            | b0118                    | Bifunctional aconitate hydratase 2 and 2-methylisocitrate dehydratase (Aconitase 2)    |
| <i>adhP</i>            | b1478                    | Ethanol-active dehydrogenase/acetaldehyde-active reductase                             |
| <i>aldA</i>            | b1415                    | Aldehyde dehydrogenase A, NAD-linked                                                   |
| <i>allA</i>            | b0505                    | Ureidoglycolate lyase                                                                  |
| <i>appA</i>            | b0980                    | Acid phosphatase                                                                       |
| <i>apt</i>             | b0469                    | Adenine phosphoribosyltransferase                                                      |
| <i>argG</i>            | b3172                    | Argininosuccinate synthase                                                             |
| <i>aroF</i>            | b2601                    | 2-dehydro-3-deoxyphosphoheptonate aldolase                                             |
| <i>aspC</i>            | b0928                    | Aspartate aminotransferase, PLP-dependent                                              |
| <i>atoB</i>            | b2224                    | Acetyl-CoA C-acetyltransferase                                                         |
| <i>avtA</i>            | b3572                    | Valine-pyruvate aminotransferase                                                       |
| <i>codA</i>            | b0337                    | Cytosine deaminase                                                                     |
| <i>cpdB</i>            | b4213                    | 2',3'-cyclic nucleotide 2'-phosphodiesterase / 3'-nucleotidase                         |
| <i>cpsG</i>            | b2048                    | D-mannose 1,6-phosphomutase                                                            |
| <i>crr</i>             | b2417                    | Glucose-specific enzyme IIA component of PTS/ permease                                 |
| <i>cynS</i>            | b0340                    | Cyanase (cyanate hydrolase)                                                            |
| <i>cysE</i>            | b3607                    | Serine acetyltransferase component of bifunctional CysEK cysteine biosynthesis complex |
| <i>cysG</i>            | b3368                    | Uroporphyrin III C-methyltransferase (multifunctional)                                 |
| <i>dacA</i>            | b0632                    | D-alanyl-D-alanine carboxypeptidase                                                    |
| <i>dapA</i>            | b2478                    | 4-hydroxy-tetrahydrodipicolinate synthase                                              |
| <i>dctA</i>            | b3528                    | C4 di-carboxylate transporter aerobic                                                  |
| <i>dcuA</i>            | b4138                    | C4 di-carboxylate transporter anaerobic                                                |
| <i>dcuB</i>            | b4123                    | C4 di-carboxylate transporter anaerobic                                                |
| <i>dcuC</i>            | b0621                    | C4 di-carboxylate transporter anaerobic                                                |
| <i>dcuR</i>            | b4124                    | DcuR-Phosphorylated DNA-binding transcriptional activator                              |
| <i>deoA</i>            | b4382                    | Thymidine phosphorylase / uracil phosphorylase                                         |
| <i>deoB</i>            | b4383                    | Phosphopentomutase                                                                     |
| <i>dgkA</i>            | b4042                    | Diacylglycerol kinase                                                                  |
| <i>dhaK</i>            | b1200                    | Dihydroxyacetone kinase subunit K                                                      |
| <i>dhaL</i>            | b1199                    | Dihydroxyacetone kinase subunit L                                                      |
| <i>dld</i>             | b2133                    | D-lactate dehydrogenase                                                                |
| <i>dxs</i>             | b0420                    | 1-deoxyxylulose-5-phosphate synthase                                                   |
| <i>edd</i>             | b1851                    | Fosfogluconate dehydratase                                                             |
| <i>eutG</i>            | b2453                    | Predicted alcohol dehydrogenase in ethanolamine utilization                            |
| <i>fabH</i>            | b1091                    | 3-oxo-glutaryl-(ACP)methyl ester synthase; $\beta$ -ketoacyl-ACP synthase (KASIII)     |

|             |       |                                                                    |
|-------------|-------|--------------------------------------------------------------------|
| <i>fbp</i>  | b4232 | Fructose 1,6 bisphosphatase I                                      |
| <i>fdhF</i> | b4079 | Formate dehydrogenase-H (hydrogenase 3)                            |
| <i>fdnG</i> | b1474 | Formate dehydrogenase-N, $\alpha$ subunit                          |
| <i>fdnH</i> | b1475 | Formate dehydrogenase-N, $\beta$ subunit                           |
| <i>fdnI</i> | b1476 | Formate dehydrogenase-N, $\gamma$ subunit                          |
| <i>fdoG</i> | b3894 | formate dehydrogenase-O, $\alpha$ subunit                          |
| <i>fdoH</i> | b3893 | formate dehydrogenase-O, $\beta$ subunit                           |
| <i>fdoI</i> | b3892 | formate dehydrogenase-O, $\gamma$ subunit                          |
| <i>fhIA</i> | b2731 | FhIA-Formate DNA-binding transcriptional activator                 |
| <i>focA</i> | b0904 | Formate channel                                                    |
| <i>focB</i> | b2492 | Formate nitrite transporter (FNT)                                  |
| <i>frdA</i> | b4154 | Fumarate reductase flavoprotein                                    |
| <i>frdB</i> | b4153 | Fumarate reductase iron-sulfur protein                             |
| <i>frdC</i> | b4152 | Fumarate reductase subunit anchor to inner membrane                |
| <i>frdD</i> | b4152 | Fumarate reductase subunit anchor to inner membrane                |
| <i>frmA</i> | b0356 | S-(hydroxymethyl)glutathione dehydrogenase / alcohol dehydrogenase |
| <i>fucO</i> | b2799 | L-1,2-propanediol oxidoreductase                                   |
| <i>fumA</i> | b1612 | Fumarase A class I                                                 |
| <i>fumB</i> | b4122 | Fumarase B class I                                                 |
| <i>fumC</i> | b1611 | Fumarase C class II                                                |
| <i>gabD</i> | b2661 | Succinate-semialdehyde dehydrogenase (NADP+)                       |
| <i>gadB</i> | b1493 | Glutamate decarboxylase $\beta$ subunit                            |
| <i>galK</i> | b0757 | Galactokinase                                                      |
| <i>gatY</i> | b2096 | Tagatose-1,6-bisphosphate aldolase 2                               |
| <i>gcvT</i> | b2905 | Aminomethyltransferase                                             |
| <i>gdhA</i> | b1761 | Glutamate dehydrogenase                                            |
| <i>gldA</i> | b3945 | L-1,2-propanediol dehydrogenase / glycerol dehydrogenase           |
| <i>glgC</i> | b3430 | Glucose-1-phosphate adenyllyltransferase                           |
| <i>glnA</i> | b3870 | Glutamine synthetase                                               |
| <i>gloB</i> | b0212 | Hydroxyacylglutathione hydrolase                                   |
| <i>glpA</i> | b2241 | Glycerol-3-phosphate-dehydrogenase subunit anchor to FAD/NAD(P)    |
| <i>glpB</i> | b2242 | Glycerol-3-phosphate-dehydrogenase subunit anchor to membrane      |
| <i>glpC</i> | b2243 | Glycerol-3-phosphate-dehydrogenase small subunit                   |
| <i>glpD</i> | b3426 | Glycerol 3-phosphate dehydrogenase, aerobic                        |
| <i>glpF</i> | b3927 | Glycerol facilitator                                               |
| <i>glpK</i> | b3926 | Glycerol kinase                                                    |
| <i>glpT</i> | b2240 | Glycerol-3-P Major Facilitator Superfamily (MFS)                   |
| <i>gltA</i> | b0720 | Citrate synthase type II                                           |
| <i>gnd</i>  | b2029 | 6-phosphogluconate dehydrogenase                                   |
| <i>gntK</i> | b3437 | D-gluconate kinase, thermostable                                   |
| <i>gntR</i> | b3438 | GntR DNA-binding transcriptional repressor                         |
| <i>guaC</i> | b0104 | GMP reductase                                                      |
| <i>hemE</i> | b3997 | Uroporphyrinogen decarboxylase                                     |
| <i>hisB</i> | b2022 | Imidazoleglycerol-phosphate dehydratase / histidinol-phosphatase   |
| <i>hpt</i>  | b0125 | Hypoxanthine phosphoribosyltransferase                             |
| <i>hyaA</i> | b0972 | Hydrogenase 1 small subunit                                        |

|                    |       |                                                                                               |
|--------------------|-------|-----------------------------------------------------------------------------------------------|
| <i>hyaB</i>        | b0973 | Hydrogenase 1 large subunit                                                                   |
| <i>hyuA</i>        | b2873 | Phenylhydantoinase                                                                            |
| <i>icd</i>         | b1136 | Isocitrate dehydrogenase                                                                      |
| <i>icdC</i>        | b4519 | Isocitrate dehydrogenase (predicted protein)                                                  |
| <i>idnK</i>        | b4268 | Gluconate kinase                                                                              |
| <i>idnO</i>        | b4266 | 5-keto-D-gluconate 5-reductase                                                                |
| <i>ilvH</i>        | b0078 | Acetohydroxybutanoate synthase / acetolactate synthase, small regulatory subunit              |
| <i>ilvI</i>        | b0077 | Acetohydroxybutanoate synthase / acetolactate synthase, large catalytic subunit               |
| <i>ilvM</i>        | b3769 | Bifunctional acetohydroxybutanoate synthase / acetolactate synthase, large subunit            |
| <i>ilvN</i>        | b3670 | Bifunctional acetohydroxybutanoate synthase / acetolactate synthase, small regulatory subunit |
| <i>kdgK</i>        | b3526 | 2-keto-3-deoxygluconokinase                                                                   |
| <i>kdgR</i>        | b1827 | Kdgr DNA-binding transcriptional repressor                                                    |
| <i>ldhA</i>        | b1380 | D-lactate dehydrogenase                                                                       |
| <i>lpcA</i>        | b0222 | D-sedoheptulose 7-phosphate isomerase                                                         |
| <i>lpd</i>         | b0116 | Lipoamide dehydrogenase; 2-oxoglutarate dehydrogenase complex and pyruvate dehydrogenase      |
| <i>maeA</i>        | b1479 | Malic enzyme, NAD-requiring                                                                   |
| <i>maeB</i>        | b2463 | Malic enzyme, NADP-requiring                                                                  |
| <i>mdh</i>         | b3236 | Malate dehydrogenase                                                                          |
| <i>melA</i>        | b4119 | $\alpha$ -galactosidase                                                                       |
| <i>mgsA</i>        | b0963 | Methylglyoxal synthase                                                                        |
| <i>mhpF</i>        | b0351 | Acetaldehyde dehydrogenase 2                                                                  |
| <i>nadB</i>        | b2574 | L-aspartate oxidase                                                                           |
| <i>nanE</i>        | b3223 | Predicted N-acetylmannosamine-6-phosphate epimerase                                           |
| <i>ndk</i>         | b2518 | Nucleoside diphosphate kinase                                                                 |
| <i>nirB</i>        | b3365 | Nitrite reductase small subunit                                                               |
| <i>nrfA</i>        | b4070 | Formate dependent nitrite reductase                                                           |
| <i>pck</i>         | b3403 | Phosphoenolpyruvate carboxykinase                                                             |
| <i>pflA</i>        | b0902 | Pyruvate formate-lyase activating enzyme                                                      |
| <i>pflB</i>        | b0903 | Pyruvate formate-lyase I (inactive)                                                           |
| <i>pflC</i>        | b3952 | Pyruvate formate-lyase activating enzyme                                                      |
| <i>pflD</i>        | b3951 | Formate acetyltransferase 2 predicted protein                                                 |
| <i>pflF(=ybiW)</i> | b0823 | Predicted pyruvate formate lyase formate C-acetyltransferase                                  |
| <i>ppc</i>         | b3956 | Phosphoenolpyruvate carboxylase                                                               |
| <i>pta</i>         | b2297 | Phosphate acetyltransferase / phosphate propionyltransferase                                  |
| <i>ptsG</i>        | b1101 | Glucose PTS permease- PtsG subunit                                                            |
| <i>purF</i>        | b2312 | Amidophosphoribosyl transferase                                                               |
| <i>pyrC</i>        | b1062 | Dihydroorotase                                                                                |
| <i>pyrF</i>        | b1281 | Orotidine-5'-phosphate decarboxylase                                                          |
| <i>rffE</i>        | b3786 | UDP-N-acetylglucosamine-2-epimerase                                                           |
| <i>rpe</i>         | b3386 | D-ribulose-5-phosphate 3-epimerase                                                            |
| <i>rpiA</i>        | b2914 | Ribose 5-phosphate isomerase, constitutive                                                    |
| <i>rpiB</i>        | b4090 | Ribose 5-phosphate isomerase A                                                                |
| <i>sdhA</i>        | b0723 | Succinate dehydrogenase flavoprotein                                                          |
| <i>sdhB</i>        | b0724 | Succinate dehydrogenase iron-sulfur protein                                                   |

|             |       |                                                                        |
|-------------|-------|------------------------------------------------------------------------|
| <i>sdhC</i> | b0721 | Succinate dehydrogenase membrane protein                               |
| <i>sdhD</i> | b0722 | Succinate dehydrogenase membrane protein                               |
| <i>serA</i> | b2913 | $\alpha$ -ketoglutarate reductase / D-3-phosphoglycerate dehydrogenase |
| <i>sucA</i> | b0726 | 2-oxoglutarate decarboxylase, thiamine-requiring                       |
| <i>sucB</i> | b0727 | SucB-S-succinylidihydroliipoate                                        |
| <i>sucC</i> | b0728 | Succinyl-CoA synthetase $\beta$ subunit                                |
| <i>sucD</i> | b0729 | Succinyl-CoA synthetase $\alpha$ subunit                               |
| <i>talA</i> | b2464 | Transaldolase A                                                        |
| <i>talB</i> | b0008 | Transaldolase B                                                        |
| <i>tdcA</i> | b3118 | TdcA DNA-binding transcriptional activator                             |
| <i>tdcB</i> | b3117 | Catabolic threonine dehydratase                                        |
| <i>tdcC</i> | b3116 | TdcC threonine/serine STP transporter                                  |
| <i>tdcD</i> | b3115 | Propionate kinase                                                      |
| <i>tdcE</i> | b3114 | 2-ketobutyrate formate-lyase (KFL)                                     |
| <i>tdcG</i> | b4471 | L-serine deaminase III                                                 |
| <i>tdcR</i> | b3119 | TdcR DNA-binding transcriptional activator                             |
| <i>tktA</i> | b2935 | Transketolase I                                                        |
| <i>tktB</i> | b2465 | Transketolase II                                                       |
| <i>yahI</i> | b0323 | Predicted carbamate kinase-like protein                                |
| <i>ycjM</i> | b1309 | Predicted glucosyltransferase                                          |
| <i>yiaY</i> | b3589 | Predicted Fe-containing alcohol dehydrogenase                          |
| <i>yneH</i> | b1524 | Glutaminase                                                            |
| <i>zwf</i>  | b1852 | Glucose-6-phosphate 1-dehydrogenase                                    |
