# Supplementary material for: Identification of enhanced hydrogen and ethanol Escherichia coli producer strains in a glycerol-based medium by screening in single-knock out mutant collections
Source: PubMed Central journal article supplement (PMC4485358; doi:10.1186/s12934-015-0285-6), 2015-06-28
Supplement: 12934_2015_285_MOESM3_ESM.pdf [file 12934_2015_285_MOESM3_ESM.pdf]

| Y <sub>H2/X</sub> |      |             |      |
|-------------------|------|-------------|------|
| Mutants           | 22 h | Mutants     | 46 h |
| <i>frdC</i>       | 0.65 | <i>gadB</i> | 0.21 |
| <i>frdB</i>       | 0.59 | <i>deoB</i> | 0.20 |
| <i>gnd</i>        | 0.37 | <i>tdcE</i> | 0.16 |
| <i>rpiA</i>       | 0.29 | <i>fumA</i> | 0.16 |
| <i>nanE</i>       | 0.26 | <i>frmA</i> | 0.14 |
| <i>frdA</i>       | 0.20 | <i>frdB</i> | 0.14 |
| <i>sucA</i>       | 0.19 | <i>gcvT</i> | 0.13 |
| <i>acnB</i>       | 0.17 | <i>sucC</i> | 0.13 |
| <i>talB</i>       | 0.14 | <i>pflD</i> | 0.11 |
| <i>tdcE</i>       | 0.12 | <i>acnB</i> | 0.11 |
| <i>talA</i>       | 0.12 | <i>kdgR</i> | 0.10 |
| <i>eutG</i>       | 0.12 | <i>fumB</i> | 0.10 |
| <i>aldA</i>       | 0.12 | <i>frdA</i> | 0.07 |
| <i>focA</i>       | 0.11 | <i>glpT</i> | 0.07 |
| <i>gcvT</i>       | 0.10 |             |      |
| <i>sucC</i>       | 0.09 |             |      |
| <i>fumB</i>       | 0.08 |             |      |

| Y <sub>E/X</sub> |      |             |      |
|------------------|------|-------------|------|
| Mutants          | 22 h | Mutants     | 46 h |
| <i>frdC</i>      | 0.94 | <i>gnd</i>  | 0.63 |
| <i>gnd</i>       | 0.67 | <i>hyuA</i> | 0.43 |
| <i>frdB</i>      | 0.61 | <i>tdcE</i> | 0.36 |
| <i>rpiA</i>      | 0.55 | <i>tktB</i> | 0.34 |
| <i>ldhA</i>      | 0.52 | <i>gntR</i> | 0.34 |
| <i>idnK</i>      | 0.52 | <i>eutG</i> | 0.34 |
| <i>hyuA</i>      | 0.48 | <i>yiaY</i> | 0.33 |
| <i>tdcE</i>      | 0.46 | <i>idnO</i> | 0.33 |
| <i>gntK</i>      | 0.40 | <i>ldhA</i> | 0.33 |
| <i>frdA</i>      | 0.39 | <i>idnK</i> | 0.32 |
| <i>kdgK</i>      | 0.35 | <i>kdgR</i> | 0.30 |
| <i>tktA</i>      | 0.31 | <i>glpF</i> | 0.29 |
| <i>ilvI</i>      | 0.29 | <i>dacA</i> | 0.28 |
| <i>glgC</i>      | 0.21 |             |      |

| Y <sub>Glic/X</sub> |      |             |      |
|---------------------|------|-------------|------|
| Mutants             | 22 h | Mutants     | 46 h |
| <i>nanE</i>         | 1.04 | <i>gnd</i>  | 0.37 |
| <i>frdC</i>         | 0.81 | <i>frmA</i> | 0.36 |
| <i>rffE</i>         | 0.76 | <i>rffE</i> | 0.33 |
| <i>frdB</i>         | 0.59 | <i>cpsG</i> | 0.32 |
| <i>rpiA</i>         | 0.46 | <i>fabH</i> | 0.29 |
| <i>gnd</i>          | 0.35 | <i>galK</i> | 0.28 |
| <i>cpsG</i>         | 0.34 | <i>glgC</i> | 0.28 |
| <i>tdcE</i>         | 0.33 | <i>tdcE</i> | 0.21 |
| <i>galK</i>         | 0.31 | <i>deoB</i> | 0.20 |
| <i>glgC</i>         | 0.31 | <i>nanE</i> | 0.20 |
| <i>idnK</i>         | 0.28 | <i>aldA</i> | 0.17 |
| <i>ldhA</i>         | 0.28 | <i>frdC</i> | 0.17 |
| <i>gntK</i>         | 0.24 | <i>sucC</i> | 0.17 |
| <i>tdcB</i>         | 0.21 | <i>eutG</i> | 0.14 |
| <i>kdgK</i>         | 0.15 | <i>PFLD</i> | 0.14 |
| <i>fdoH</i>         | 0.14 | <i>tktB</i> | 0.13 |
|                     |      | <i>yiaY</i> | 0.12 |
|                     |      | <i>aceF</i> | 0.12 |
|                     |      | <i>fumA</i> | 0.10 |
