# Supplementary material for: Identification of enhanced hydrogen and ethanol Escherichia coli producer strains in a glycerol-based medium by screening in single-knock out mutant collections
Source: PubMed Central journal article supplement (PMC4485358; doi:10.1186/s12934-015-0285-6), 2015-06-28

Mutants

Growth rate ( $\mu$ )

-5·10<sup>-3</sup>      0      5·10<sup>-3</sup>      1·10<sup>-2</sup>

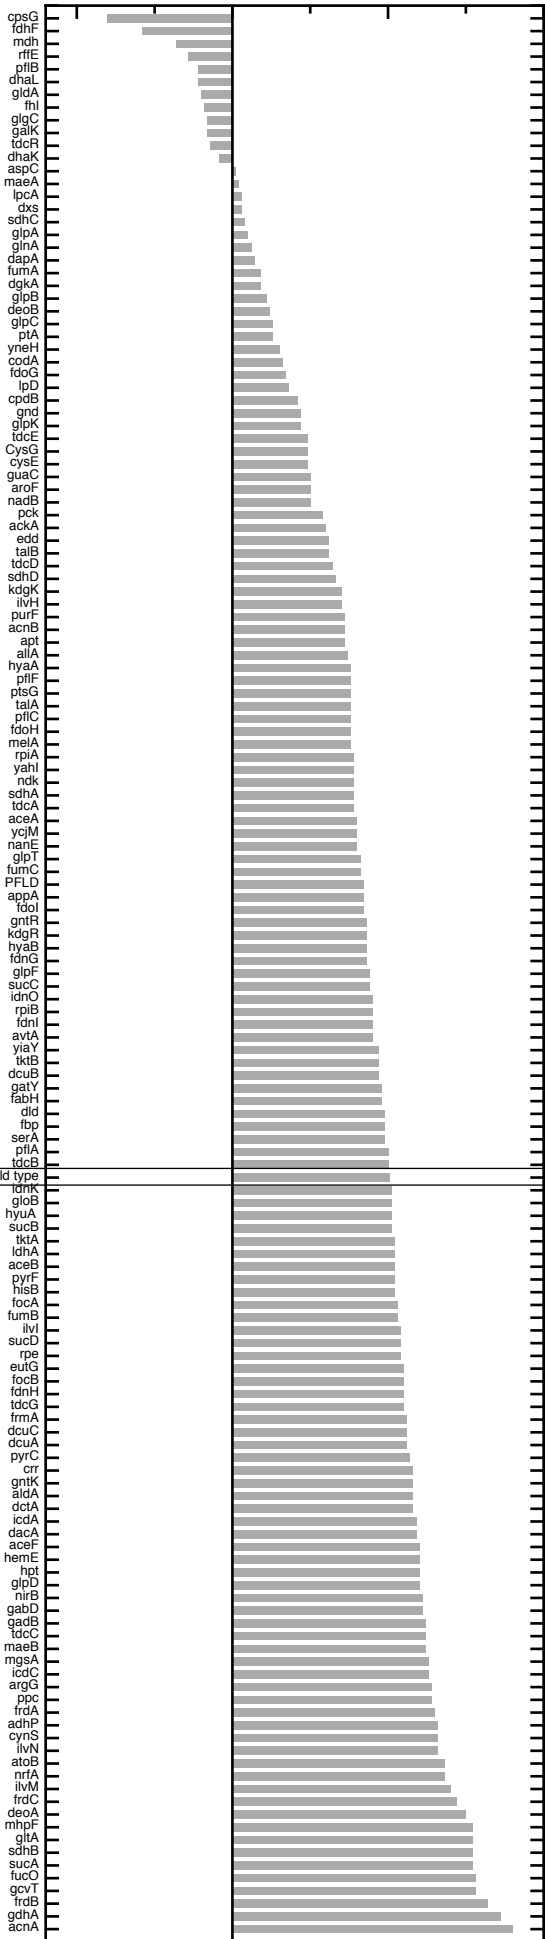

Supplement: 12934_2015_285_MOESM4_ESM.pdf [file 12934_2015_285_MOESM4_ESM.pdf]
