# Supplementary material for: Identification of enhanced hydrogen and ethanol Escherichia coli producer strains in a glycerol-based medium by screening in single-knock out mutant collections
Source: PubMed Central journal article supplement (PMC4485358; doi:10.1186/s12934-015-0285-6), 2015-06-28
Supplement: 12934_2015_285_MOESM8_ESM.pdf [file 12934_2015_285_MOESM8_ESM.pdf]

| <b>Primers</b> | <b>Sequences</b>                                                           |
|----------------|----------------------------------------------------------------------------|
| H1P4-gnd       | CCATTCAGCGCGGTGATCACACCTGACAGGAGTATGTAATGattccggggatccgctgacc              |
| H2P1-gnd       | TATTGTTGGTTAAATCAGATTAATCCAGCCATTCGGTATGtgtaggctggagctgcttcg               |
| H1P4-frdBC     | GGATGCAGCCGATAAGGCGGAAGCAGCCAATAAGAAGGAGAAGGCGAATGattccgg<br>ggatccgctgacc |
| H2P1-frdBC     | TTGGATTTGGATTAATCATCTCAGGCTCCTTACCAGTACAGGGCAACAAAgttaggctgg<br>agctgcttcg |
| H1P4-tdcE      | ATAATTTAGTTGAAGTATTGTAGAGAGATTATTTTTTCATGattccggggatccgctgacc              |
| H2P1-tdcE      | TCATACATCCTCCGGCGTCAGAGCGCCTGGGTAAAGGTTGtgtaggctggagctgcttcg               |
| ldhA-F         | TGGCGATTGCTCCGTCTGCC                                                       |
| ldhA-R         | GCGGTCGCCAGCGTAACTG                                                        |
| gnd-F          | TTGTGCGTGTAATGGCTTCG                                                       |
| gnd-R          | GGATCATAGTCGGTTGGAGTG                                                      |
| frdA-F         | ACGAAGTCTACTCGCAACGC                                                       |
| frdD-R         | CCGATACTGGAGTTGGCATAC                                                      |
| tdcE-F         | TCTGGTCATGGAACATTTGGC                                                      |
| tdcE-R         | GGCTCGTCGCGGTTAATAAGC                                                      |
| kt             | CGGCCACAGTCGATGAATCC                                                       |
